# Supplementary material
Source: Springer Nature journal article supplement (https://www.springermedizin.de/resource/supplementary/13023_2009_172_MOESM2_ESM.pdf/9641870)

# Hypokalemic or difficult to treat HTN

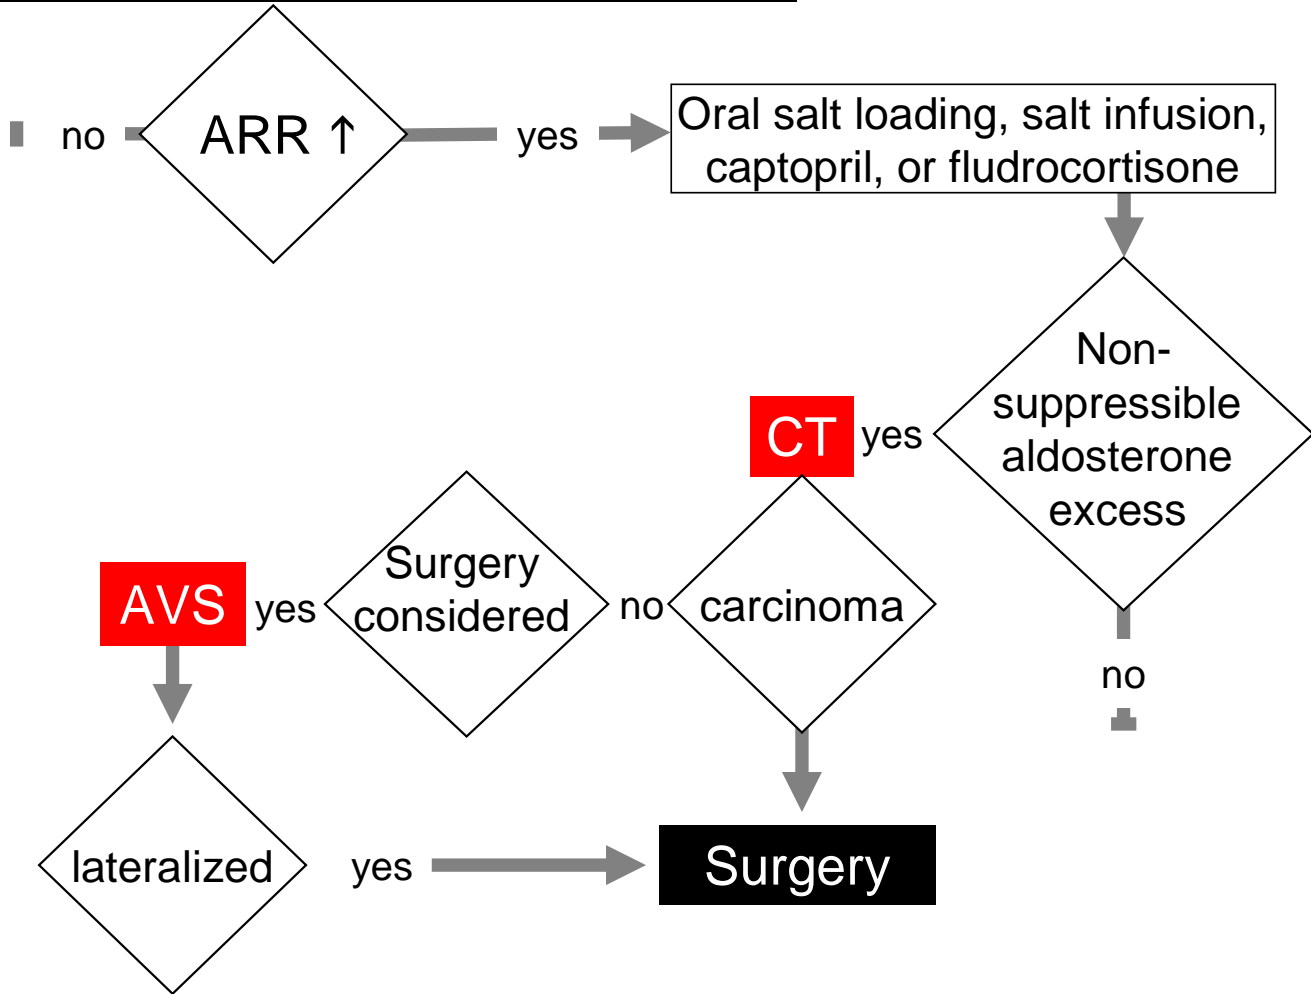

Supplement: MOESM2 [file 9641870]
